# Supplementary material
Source: PubMed Central journal article supplement (PMC9997524)
Supplement: NIHMS1873655-supplement-Figure_S1.pdf [file NIHMS1873655-supplement-Figure_S1.pdf]

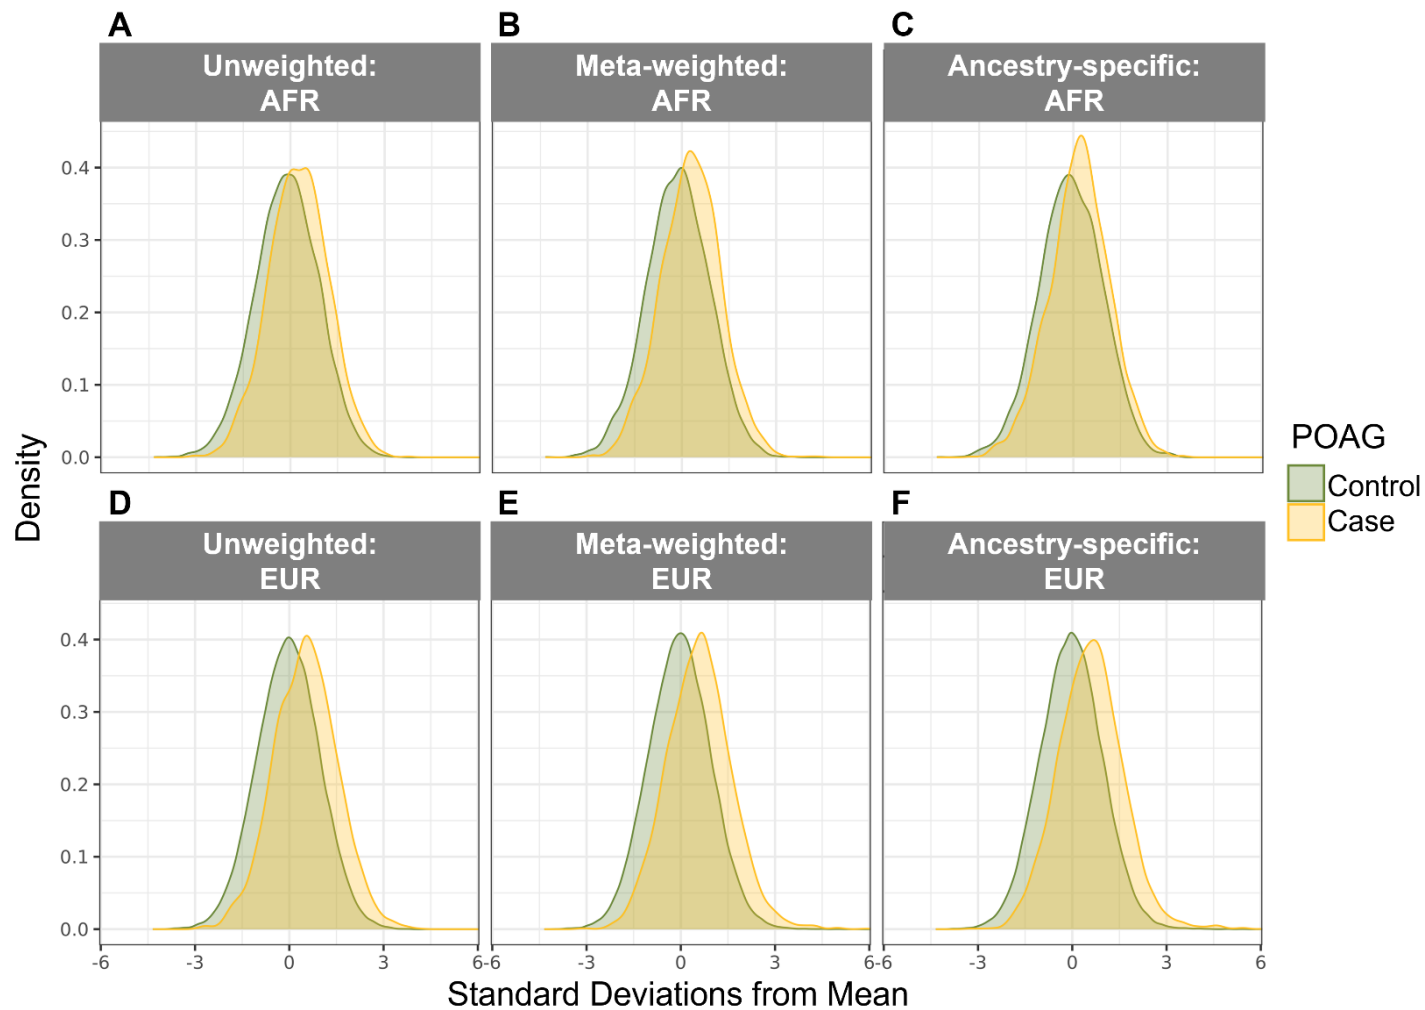

**Figure S1. GRS density distributions for glaucoma cases and controls in the MVP.** All glaucoma cases in this study were POAG. (A) Unweighted GRS in AFR, (B) Meta-weighted GRS in AFR, (C) Ancestry-specific GRS in AFR, (D) Unweighted GRS in EUR, (E) Meta-weighted GRS in EUR, (F) Ancestry-specific GRS in EUR. **Abbreviations:** AFR = non-Hispanic African ancestry, EUR = non-Hispanic European ancestry, POAG = primary open-angle glaucoma.
