# Supplementary material
Source: PubMed Central journal article supplement (PMC9997524)
Supplement: NIHMS1873655-supplement-Figure_S2.pdf [file NIHMS1873655-supplement-Figure_S2.pdf]

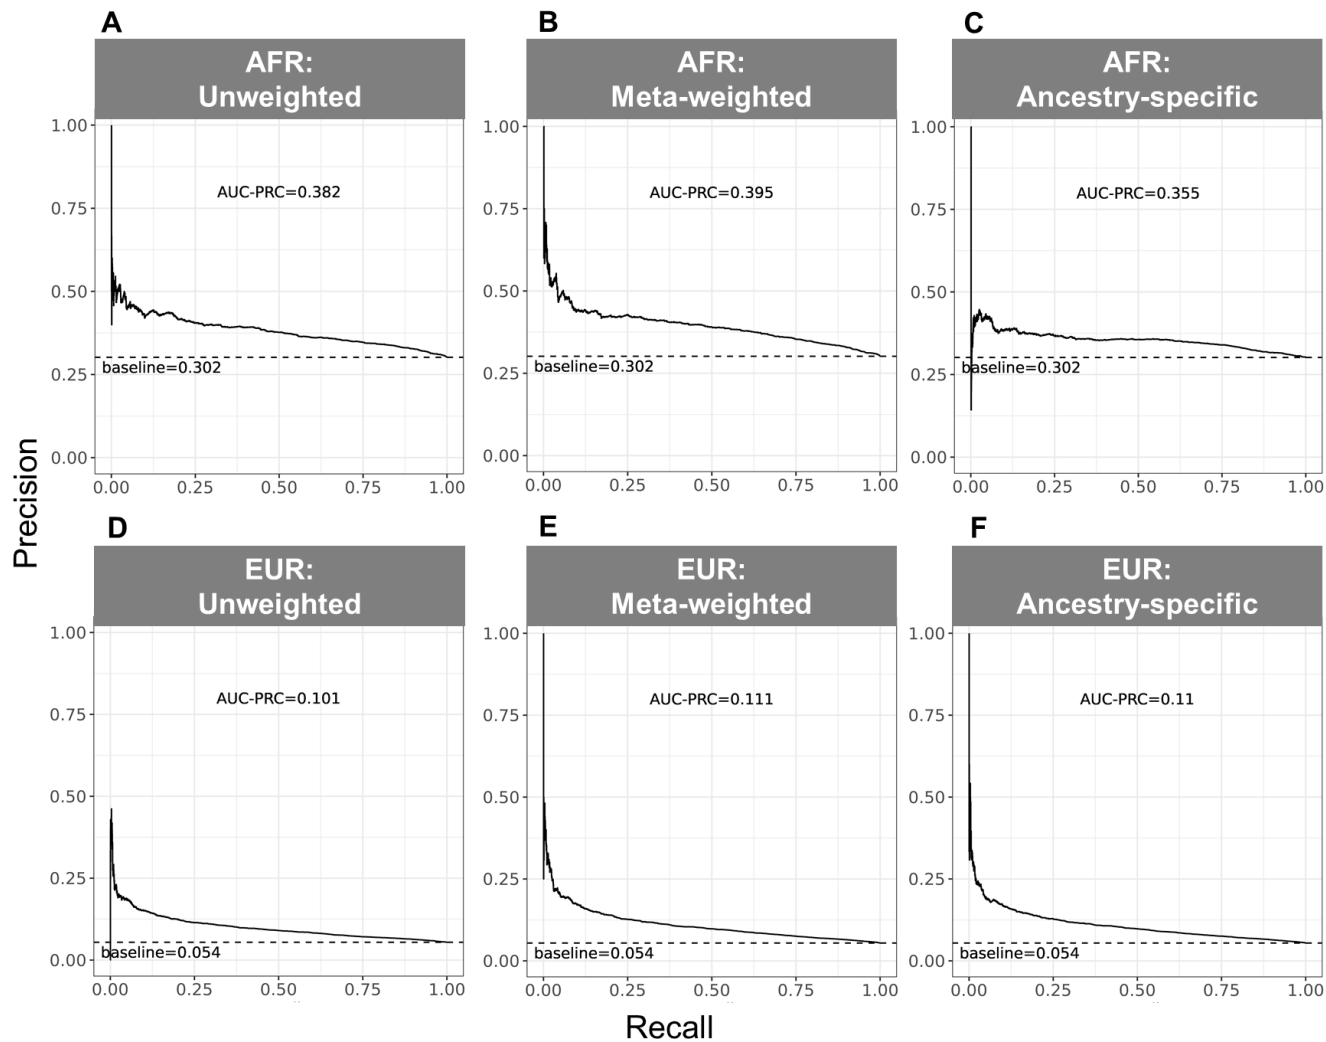

**Figure S2. Comparison of precision-recall curves by GRS type for (A-C) AFR and (D-F) and EUR Veterans for POAG risk stratification in the MVP. The baseline value represents an uninformative model analogous to 0.5 in an ROC curve. In panels A-C, the baseline value is 0.302. In panels, D-F, the baseline value is 0.054.**

**Abbreviations:** AFR = non-Hispanic African ancestry, EUR = non-Hispanic European ancestry, GRS = genetic risk score, MVP = Million Veteran Program, ROC = receiver operating characteristic.
