# Supplementary material
Source: PubMed Central journal article supplement (PMC9997524)
Supplement: NIHMS1873655-supplement-Figure_S3.pdf [file NIHMS1873655-supplement-Figure_S3.pdf]

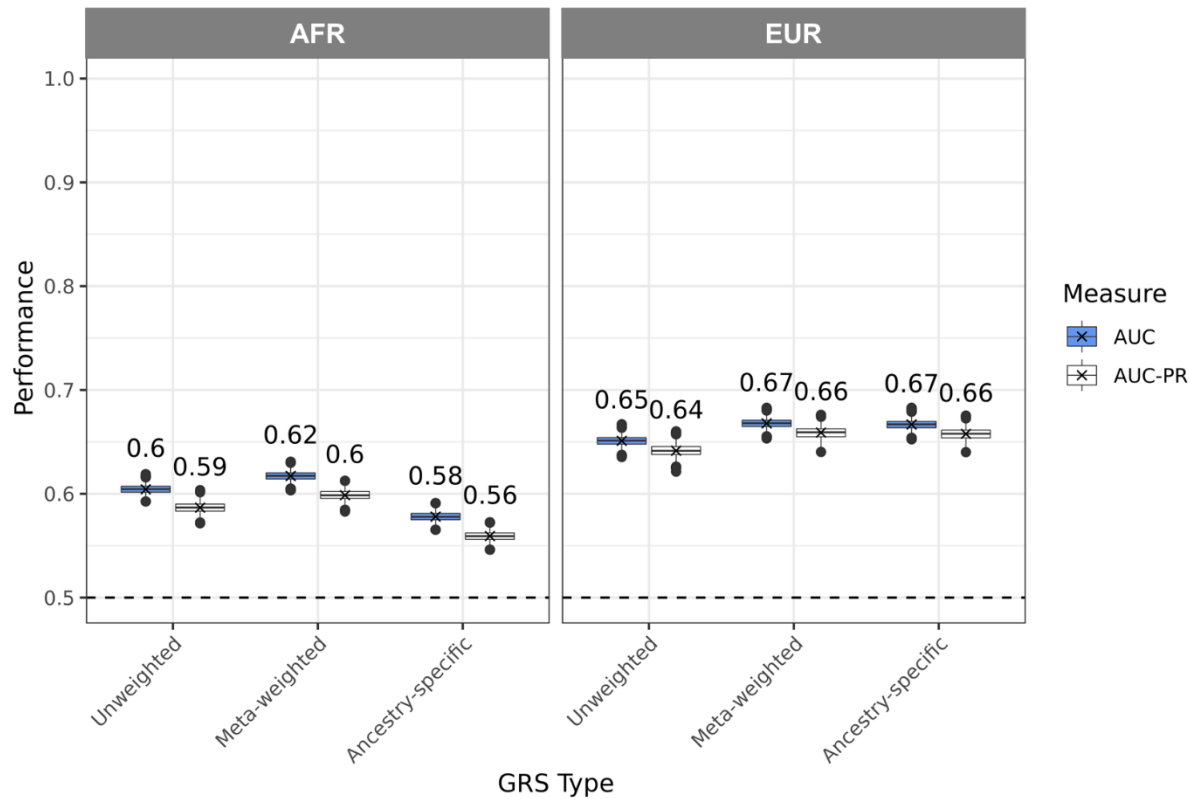

**Figure S3. Assessment of effects of case-control imbalance on AUC and AUC-PRC via down-sampling.** We tested the robustness of AUC and AUC-PRC to case-control imbalance using down-sampling. Controls were randomly selected to match the number of cases. AUC and AUC-PRC were then calculated. This was repeated for 1000 iterations. Values shown above each boxplot are the mean. **Abbreviations:** AFR = African-descent, AUC = area under the receiver operating characteristic (ROC) curve, AUC-PRC = area under the precision-recall curve, EUR = European-descent, GRS = genetic risk score.
