# Supplementary material
Source: PubMed Central journal article supplement (PMC9997524)
Supplement: NIHMS1873655-supplement-Figure_S4.pdf [file NIHMS1873655-supplement-Figure_S4.pdf]

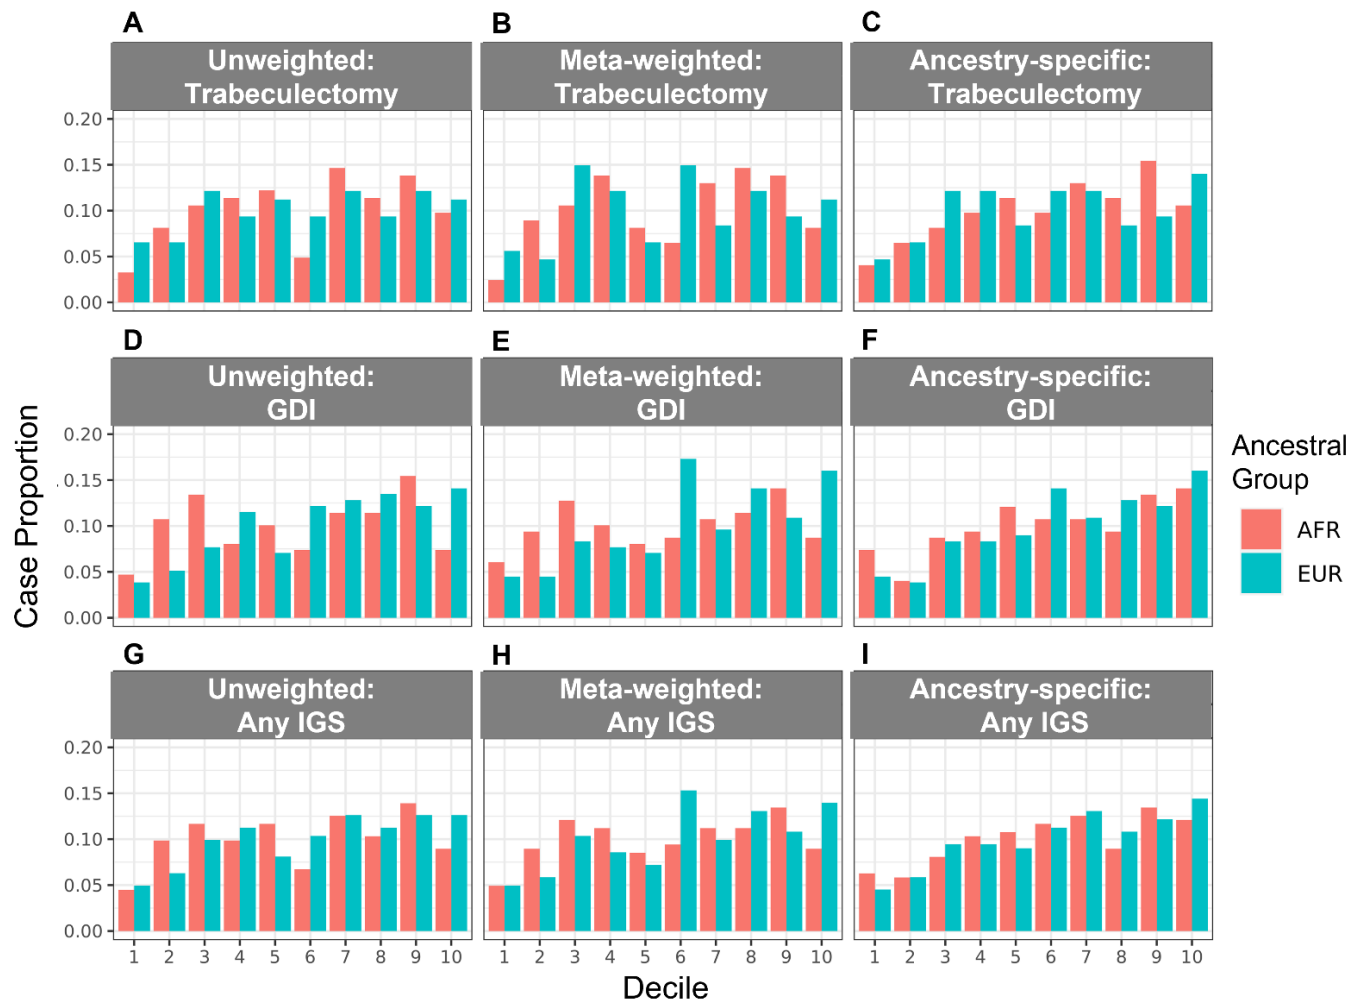

**Figure S4. Comparison of IGS case classifications based on 127-variant GRS in AFR and EUR POAG patients in the MVP.** Case proportions are shown for each decile of the (A, D, G) unweighted, (B, E, H) cross-ancestry meta-weighted, and (C, F, I) ancestry-specific GRS by ancestry group for (A-C) trabeculectomies, (D-F) GDI, and (G-I) any IGS. **Abbreviations:** AFR = non-Hispanic African ancestry, EUR = non-Hispanic European ancestry, GRS = genetic risk score, IGS = invasive glaucoma surgeries, GDI = glaucoma drainage implants, Any IGS = trabeculectomy or GDI.
