# Supplementary material
Source: PubMed Central journal article supplement (PMC9997524)
Supplement: NIHMS1873655-supplement-Figure_S5.pdf [file NIHMS1873655-supplement-Figure_S5.pdf]

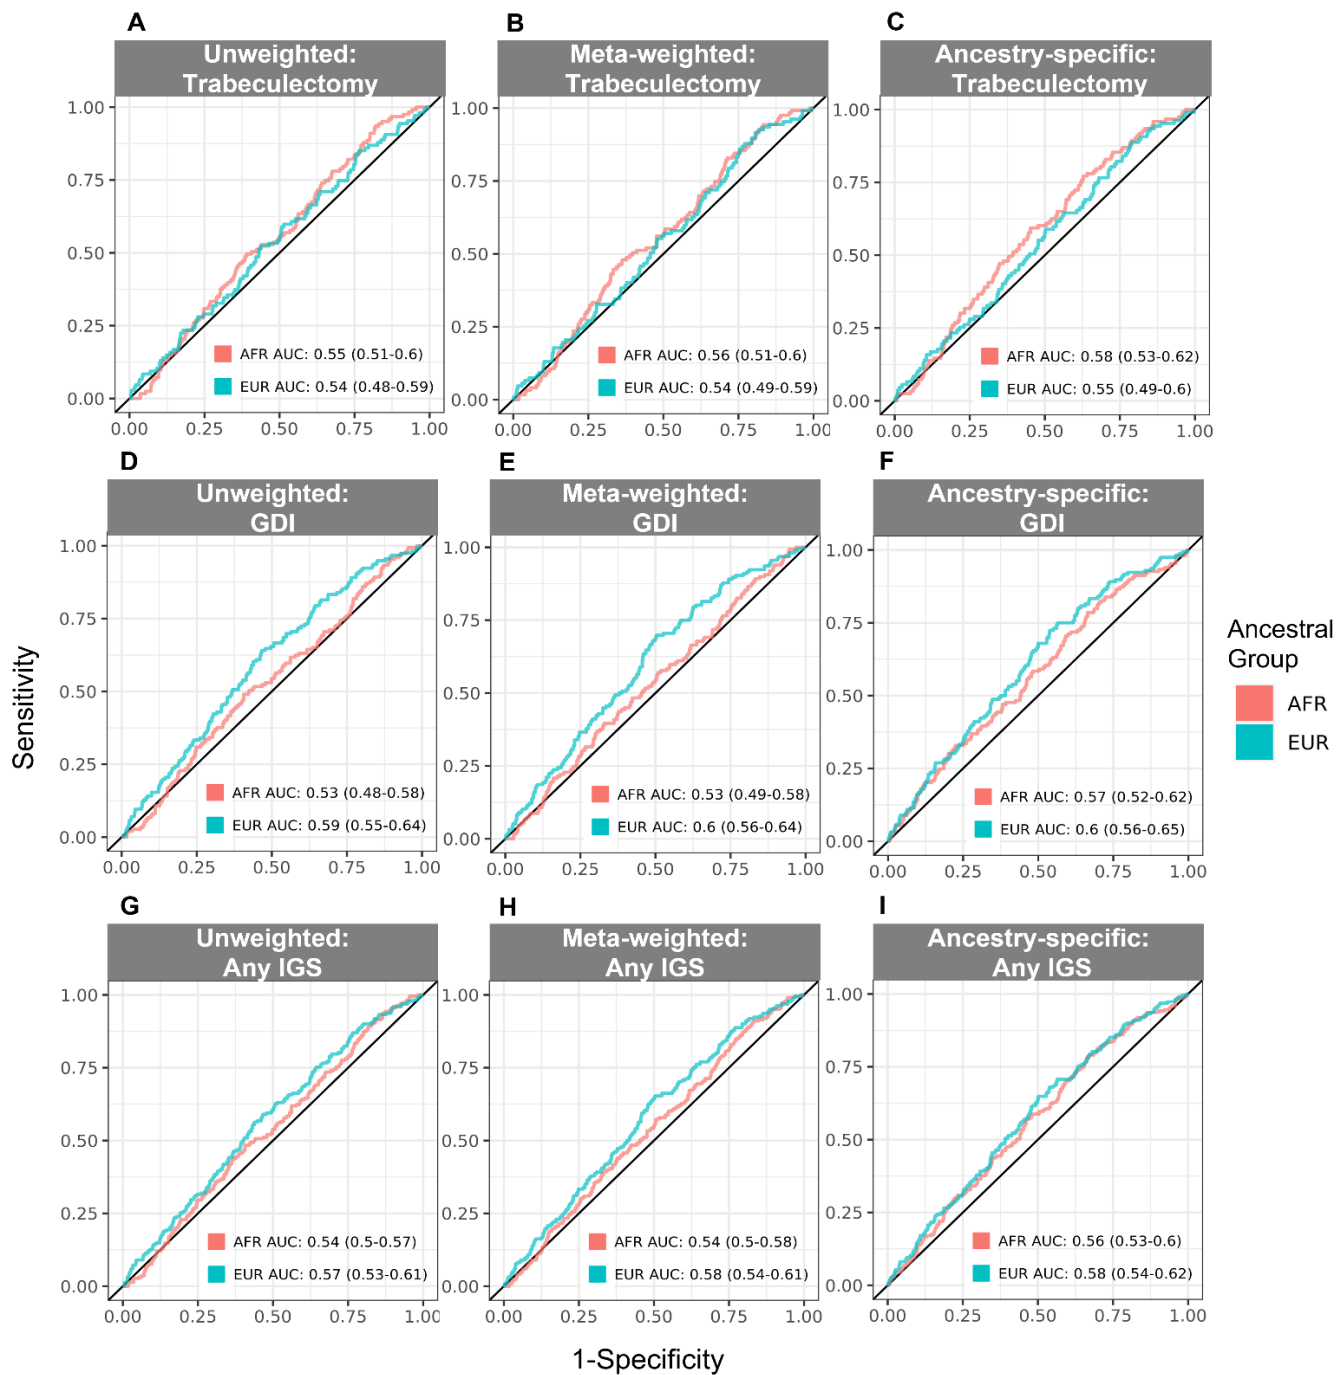

**Figure S5. Comparison of 127-variant POAG GRS performance in AFR and EUR Veterans.** ROC curves for (A-C) trabeculectomies, (D-F) GDI, and (G-I) any IGS in POAG patients in the MVP are shown. These curves were constructed for (A, D, G) unweighted, (B, E, H) meta-weighted, and (C, F, I) ancestry-specific weighted GRS in AFR and EUR Veterans. AFR and EUR AUCs are listed in the inset with their 95% confidence intervals in parentheses. **Abbreviations:** AFR = non-Hispanic African ancestry, EUR = non-Hispanic European ancestry, GRS = genetic risk score IGS = invasive glaucoma surgeries, GDI = glaucoma drainage implants, Any IGS = trabeculectomy or GDI, AUC = area under the curve, ROC = receiver operating characteristic.
