# Supplementary material
Source: PubMed Central journal article supplement (PMC9997524)
Supplement: NIHMS1873655-supplement-Figure_S6.pdf [file NIHMS1873655-supplement-Figure_S6.pdf]

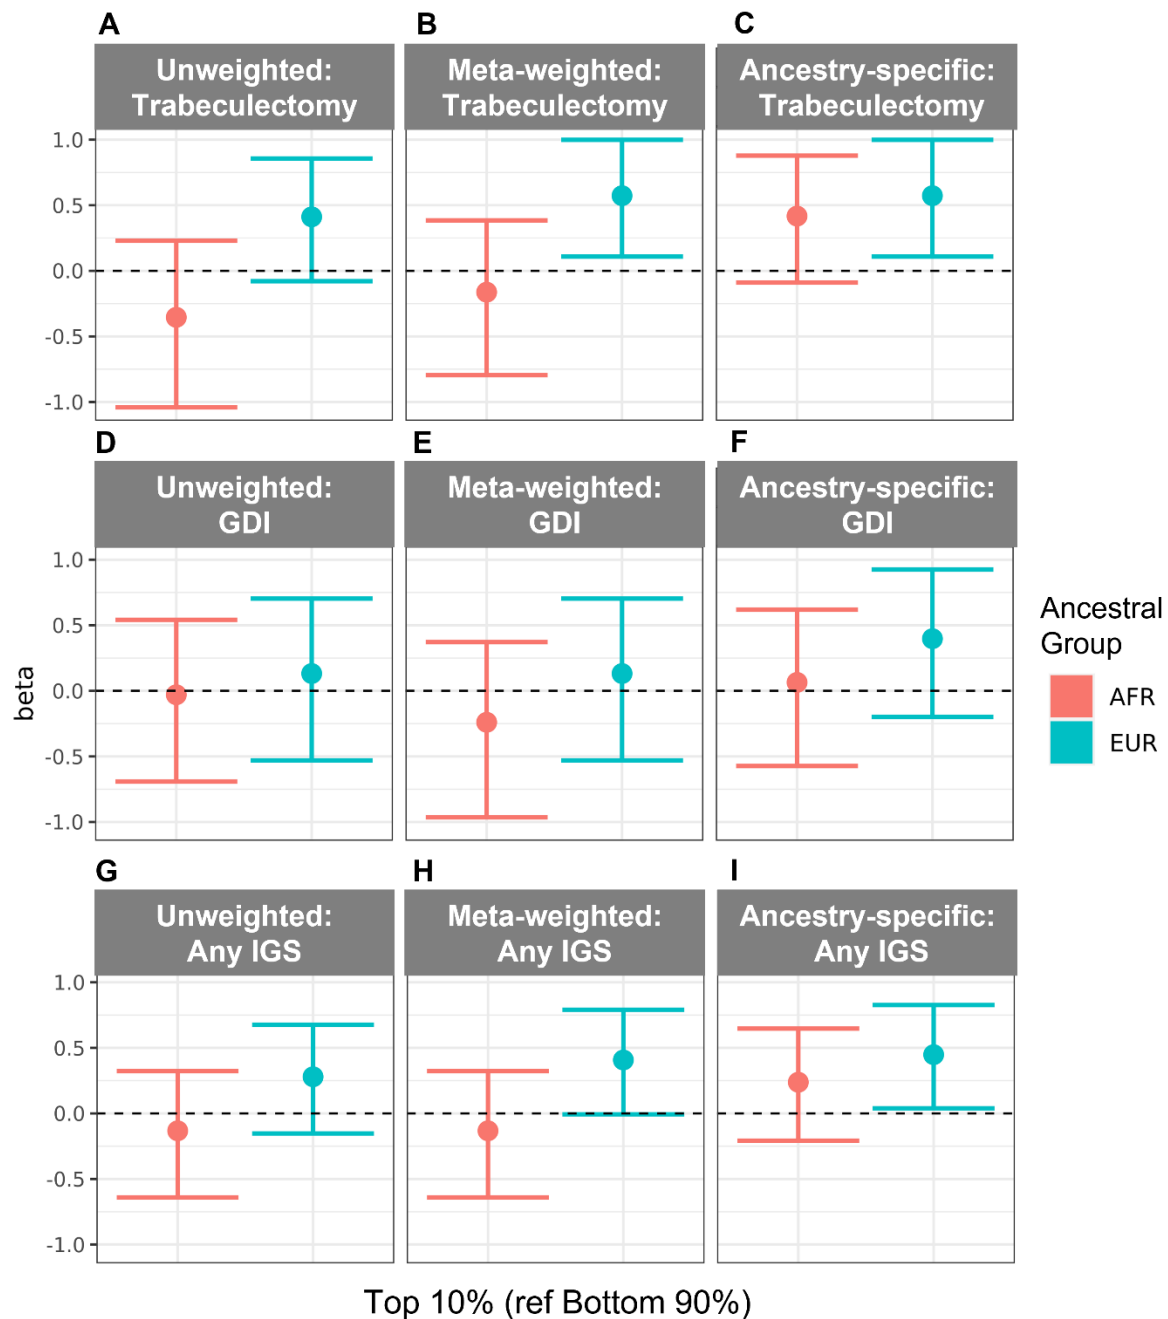

**Figure S6. Comparison of GRS deciles for trabeculectomies, GDI, and any IGS in POAG patients in the MVP.** Log odds ratios (betas) for unadjusted logistic regression-based association analyses are shown for deciles of (A, D, G) unweighted, (B, E, H) cross-ancestry meta-weighted, and (C, F, I) ancestry-specific GRS for (A-C) trabeculectomies, (D-F) GDI, and (G-I) any IGS in AFR and EUR Veterans. In all panels, deciles 1-9 (bottom 90%) were compared to decile 10 (top 10%). A full description of log odds ratios (betas) for panels A-I are shown in Table S8 (available at [www.aaojournal.org](http://www.aaojournal.org)). **Abbreviations:** AFR = non-Hispanic African ancestry, EUR = non-Hispanic European ancestry, GRS = genetic risk score, IGS = invasive glaucoma surgery.
