# Supplementary material
Source: PubMed Central journal article supplement (PMC9997524)
Supplement: NIHMS1873655-supplement-Figure_S7.pdf [file NIHMS1873655-supplement-Figure_S7.pdf]

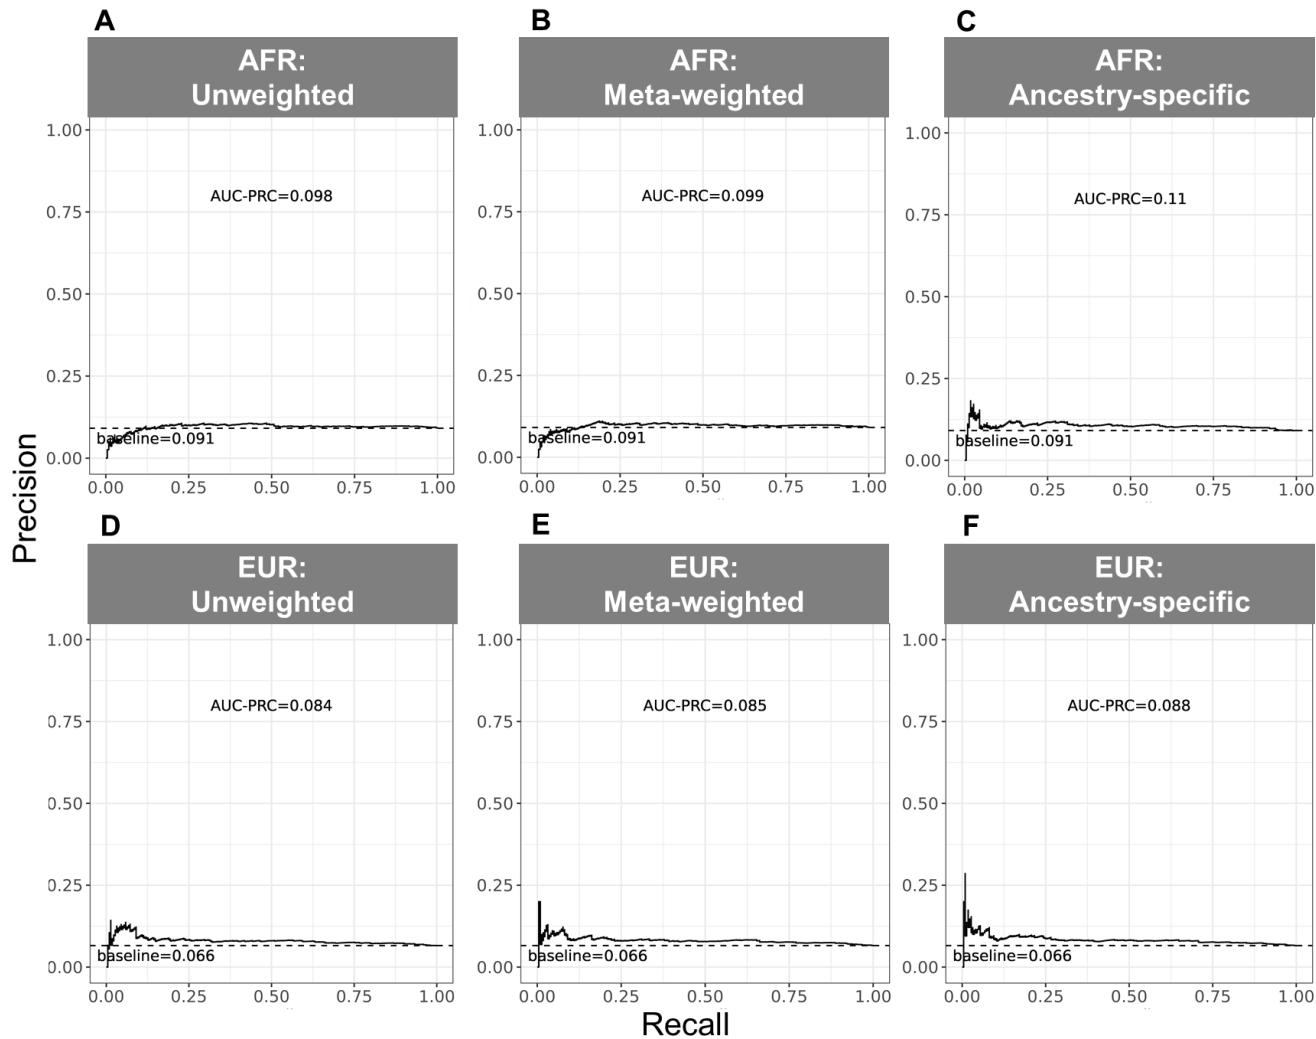

**Figure S7. Comparison of precision-recall curves by GRS type for (A-C) AFR and (D-F) and EUR Veterans for any documented IGS in the MVP.** The baseline value represents an uninformative model analogous to 0.5 in an ROC curve. In panels A-C, the baseline value is 0.091. In panels, D-F, the baseline value is 0.066.

**Abbreviations:** AFR = non-Hispanic African ancestry, AUC-PRC = area under the precision-recall curve, EUR = non-Hispanic European ancestry, GRS = genetic risk score, IGS = invasive glaucoma surgeries, MVP = Million Veteran Program, ROC = receiver operating characteristic.
