# Supplementary material
Source: PubMed Central journal article supplement (PMC9997524)
Supplement: NIHMS1873655-supplement-Table_S2.pdf [file NIHMS1873655-supplement-Table_S2.pdf]

**Table S2. Association analysis results for 127-variant POAG GRS and POAG case-control status in the MVP.** We performed logistic regression-based association analyses of the 127-variant GRS and POAG status for Veterans in the MVP. Adjusted models include covariates for age, sex, and 10 principal components. GRS were unweighted or weighted by published cross-ancestry meta-analysis or ancestry-specific effect estimates.

| Outcome | Model      | GRS Type                     | African Ancestry |            |         |                        | European Ancestry |            |         |                         |
|---------|------------|------------------------------|------------------|------------|---------|------------------------|-------------------|------------|---------|-------------------------|
|         |            |                              | Estimate         | Std. Error | z value | <i>P</i>               | Estimate          | Std. Error | z value | <i>P</i>                |
| POAG    | Unadjusted | Unweighted                   | 0.383            | 0.025      | 15.06   | $2.97 \times 10^{-51}$ | 0.557             | 0.018      | 30.625  | $5.65 \times 10^{-206}$ |
|         |            | Cross-ancestry meta-analysis | 0.439            | 0.026      | 16.687  | $1.62 \times 10^{-62}$ | 0.614             | 0.018      | 34.435  | $7.62 \times 10^{-260}$ |
|         |            | Ancestry-specific            | 0.275            | 0.025      | 11.046  | $2.28 \times 10^{-28}$ | 0.605             | 0.018      | 34.219  | $1.24 \times 10^{-256}$ |
|         | Adjusted   | Unweighted                   | 0.327            | 0.027      | 12.056  | $1.80 \times 10^{-33}$ | 0.558             | 0.018      | 30.642  | $3.36 \times 10^{-206}$ |
|         |            | Cross-ancestry meta-analysis | 0.369            | 0.028      | 13.373  | $8.67 \times 10^{-41}$ | 0.615             | 0.018      | 34.403  | $2.28 \times 10^{-259}$ |
|         |            | Ancestry-specific            | 0.240            | 0.026      | 9.232   | $2.67 \times 10^{-20}$ | 0.605             | 0.018      | 34.19   | $3.44 \times 10^{-256}$ |

**Abbreviations:** POAG = primary open-angle glaucoma, GRS = genetic risk score, MVP = Million Veteran Program.
