# Supplementary material
Source: PubMed Central journal article supplement (PMC9997524)
Supplement: NIHMS1873655-supplement-Table_S3.pdf [file NIHMS1873655-supplement-Table_S3.pdf]

**Table S3. Log odds ratios for POAG comparing each decile to the reference middle 20% (deciles 5-6) for each GRS type calculated for AFR and EUR**

**Veterans in the MVP.** GRS were unweighted or weighted by published cross-ancestry meta-analysis or ancestry-specific effect estimates. We tested for statistical association between deciles of GRS and POAG case-control status using the middle 20% (percentiles 40-60%) as the reference in our analyses. Models were unadjusted for additional covariates.

| GRS Type                            | Risk Decile (5-6 reference) | AFR beta (95% CI)      | AFR OR (95% CI)     | AFR <i>p</i> -value      | EUR beta (95% CI)      | EUR OR (95% CI)     | EUR <i>p</i> -value      |
|-------------------------------------|-----------------------------|------------------------|---------------------|--------------------------|------------------------|---------------------|--------------------------|
| <b>Unweighted</b>                   | <b>1</b>                    | -0.797 (-1.013--0.586) | 0.451 (0.363-0.557) | 2.45 x 10 <sup>-13</sup> | -0.882 (-1.085--0.688) | 0.414 (0.338-0.503) | 3.09 x 10 <sup>-18</sup> |
|                                     | <b>2</b>                    | -0.51 (-0.712--0.312)  | 0.6 (0.491-0.732)   | 5.52 x 10 <sup>-07</sup> | -0.583 (-0.763--0.408) | 0.558 (0.466-0.665) | 1.14 X 10 <sup>-10</sup> |
|                                     | <b>3</b>                    | -0.259 (-0.451--0.07)  | 0.772 (0.637-0.932) | 0.007584                 | -0.321 (-0.485--0.161) | 0.725 (0.616-0.851) | 9.81 x 10 <sup>-05</sup> |
|                                     | <b>4</b>                    | -0.151 (-0.339-0.035)  | 0.86 (0.712-1.036)  | 0.113082                 | -0.066 (-0.216-0.081)  | 0.936 (0.806-1.085) | 0.382425                 |
|                                     | <b>7</b>                    | 0.12 (-0.061-0.3)      | 1.128 (0.941-1.35)  | 0.191667                 | 0.272 (0.137-0.406)    | 1.313 (1.146-1.501) | 7.64 x 10 <sup>-05</sup> |
|                                     | <b>8</b>                    | 0.303 (0.125-0.48)     | 1.353 (1.133-1.615) | 0.000825                 | 0.428 (0.298-0.557)    | 1.534 (1.347-1.746) | 9.13 x 10 <sup>-11</sup> |
|                                     | <b>9</b>                    | 0.318 (0.141-0.495)    | 1.375 (1.151-1.641) | 0.000426                 | 0.639 (0.516-0.762)    | 1.895 (1.675-2.144) | 2.53 x 10 <sup>-24</sup> |
|                                     | <b>10</b>                   | 0.537 (0.362-0.711)    | 1.711 (1.436-2.037) | 1.67 x 10 <sup>-09</sup> | 1.039 (0.925-1.153)    | 2.826 (2.523-3.168) | 1.34 x 10 <sup>-71</sup> |
| <b>Cross-ancestry meta-analysis</b> | <b>1</b>                    | -0.748 (-0.963--0.538) | 0.473 (0.382-0.584) | 4.90 x 10 <sup>-12</sup> | -1.002 (-1.218--0.796) | 0.367 (0.296-0.451) | 1.15 x 10 <sup>-20</sup> |
|                                     | <b>2</b>                    | -0.644 (-0.854--0.439) | 0.525 (0.426-0.644) | 1.06 x 10 <sup>-09</sup> | -0.585 (-0.767--0.408) | 0.557 (0.464-0.665) | 1.65 x 10 <sup>-10</sup> |
|                                     | <b>3</b>                    | -0.263 (-0.456--0.073) | 0.769 (0.634-0.93)  | 0.007080                 | -0.332 (-0.498--0.17)  | 0.718 (0.608-0.844) | 7.24 x 10 <sup>-05</sup> |
|                                     | <b>4</b>                    | -0.198 (-0.389--0.01)  | 0.82 (0.678-0.99)   | 0.040414                 | -0.171 (-0.328--0.017) | 0.843 (0.721-0.983) | 0.031283                 |
|                                     | <b>7</b>                    | 0.196 (0.016-0.375)    | 1.217 (1.016-1.456) | 0.032453                 | 0.215 (0.076-0.353)    | 1.24 (1.079-1.423)  | 0.002326                 |
|                                     | <b>8</b>                    | 0.336 (0.158-0.513)    | 1.399 (1.171-1.67)  | 0.000210                 | 0.53 (0.402-0.658)     | 1.699 (1.495-1.93)  | 3.91 x 10 <sup>-16</sup> |
|                                     | <b>9</b>                    | 0.45 (0.274-0.626)     | 1.568 (1.315-1.869) | 5.48 x 10 <sup>-07</sup> | 0.689 (0.565-0.812)    | 1.991 (1.76-2.252)  | 5.67 x 10 <sup>-28</sup> |
|                                     | <b>10</b>                   | 0.594 (0.42-0.769)     | 1.812 (1.522-2.158) | 2.53 x 10 <sup>-11</sup> | 1.143 (1.03-1.256)     | 3.136 (2.802-3.513) | 1.68 x 10 <sup>-87</sup> |
| <b>Ancestry-specific</b>            | <b>1</b>                    | -0.654 (-0.857--0.454) | 0.52 (0.424-0.635)  | 2.04 x 10 <sup>-10</sup> | -0.981 (-1.196--0.777) | 0.375 (0.303-0.46)  | 3.77 x 10 <sup>-20</sup> |
|                                     | <b>2</b>                    | -0.393 (-0.586--0.203) | 0.675 (0.557-0.816) | 5.58 x 10 <sup>-05</sup> | -0.532 (-0.711--0.359) | 0.587 (0.491-0.699) | 3.14 x 10 <sup>-09</sup> |
|                                     | <b>3</b>                    | -0.497 (-0.693--0.303) | 0.609 (0.5-0.739)   | 6.04 x 10 <sup>-07</sup> | -0.426 (-0.598--0.259) | 0.653 (0.55-0.772)  | 8.30 x 10 <sup>-07</sup> |
|                                     | <b>4</b>                    | -0.195 (-0.382--0.011) | 0.823 (0.683-0.989) | 0.038622                 | -0.117 (-0.272-0.034)  | 0.889 (0.762-1.035) | 0.132804                 |
|                                     | <b>7</b>                    | 0.141 (-0.037-0.319)   | 1.152 (0.964-1.375) | 0.118522                 | 0.226 (0.087-0.364)    | 1.254 (1.091-1.439) | 0.001326                 |
|                                     | <b>8</b>                    | 0.043 (-0.137-0.222)   | 1.044 (0.872-1.248) | 0.639173                 | 0.486 (0.357-0.615)    | 1.626 (1.429-1.85)  | 1.53 x 10 <sup>-13</sup> |
|                                     | <b>9</b>                    | 0.131 (-0.048-0.308)   | 1.14 (0.953-1.361)  | 0.149781                 | 0.711 (0.588-0.834)    | 2.036 (1.801-2.302) | 6.23 x 10 <sup>-30</sup> |
|                                     | <b>10</b>                   | 0.293 (0.117-0.468)    | 1.34 (1.124-1.596)  | 0.001070                 | 1.149 (1.037-1.263)    | 3.156 (2.82-3.535)  | 1.81 x 10 <sup>-88</sup> |

**Abbreviations:** POAG = primary open-angle glaucoma, AFR = non-Hispanic African ancestry, EUR = non-Hispanic European ancestry, MVP = Million Veteran

Program, GRS = genetic risk score, OR = odds ratio, CI = confidence interval.
