# Supplementary material
Source: PubMed Central journal article supplement (PMC9997524)
Supplement: NIHMS1873655-supplement-Table_S4.pdf [file NIHMS1873655-supplement-Table_S4.pdf]

**Table S4. Coefficients of determination ( $R^2$ ) on the observed scale (Nagelkerke's) and the liability scale for model variables in our adjusted GRS models for AFR and EUR Veterans in the MVP.** We calculated Nagelkerke's  $R^2$  and liability  $R^2$  for each set of model variables to account for covariates in our adjusted models. To do this, we first entered age and sex into the model, then we added 10 PCs to account for population structure. We then added each GRS approach (unweighted, cross-ancestry meta-analysis weighted, and ancestry-specific weighted) into the model and calculated increases in  $R^2$  by each GRS type. In addition, we include the single genome-wide significant AFR-specific variant in *IQGAP1* (rs16944405) to each GRS. For the liability scale calculations, we used a single fixed prevalence value for POAG (2.4%; cited in Zhang et al. 2021) for the sake of comparison.

| Model Variables                                                   | AFR                                    |                 | EUR                                    |                 |
|-------------------------------------------------------------------|----------------------------------------|-----------------|----------------------------------------|-----------------|
|                                                                   | Nagelkerke's $R^2$<br>(Observed Scale) | Liability $R^2$ | Nagelkerke's $R^2$<br>(Observed Scale) | Liability $R^2$ |
| Age+Sex                                                           | 0.08645841                             | 0.05212212      | 0.001087428                            | 0.001253605     |
| Age+Sex+10PCs                                                     | 0.1031472                              | 0.06273584      | 0.002002607                            | 0.002308977     |
| Age+Sex+10PCs+GRS (Unweighted)                                    | 0.1271559                              | 0.07834008      | 0.04673353                             | 0.05427347      |
| Age+Sex+10PCs+GRS (Cross-ancestry meta-analysis weighted)         | 0.1328011                              | 0.08206801      | 0.05788033                             | 0.06734026      |
| Age+Sex+10PCs+GRS (Ancestry-specific weighted)                    | 0.117113                               | 0.07176384      | 0.05691808                             | 0.06621041      |
| Age+Sex+10PCs+GRS_IQGAP1 (Unweighted)                             | 0.1273081                              | 0.0784403       | 0.04647621                             | 0.05397238      |
| Age+Sex+10PCs+ GRS_IQGAP1 (Cross-ancestry meta-analysis weighted) | 0.1317377                              | 0.08136405      | 0.05788689                             | 0.06734797      |
| Age+Sex+10PCs+ GRS_IQGAP1 (Ancestry-specific weighted)            | 0.1171453                              | 0.07178492      | 0.05692639                             | 0.06622016      |
| <b><math>R^2</math> increase</b>                                  |                                        |                 |                                        |                 |
| GRS (Unweighted)                                                  | 0.0240087                              | 0.01560424      | 0.044730923                            | 0.051964493     |
| GRS (Cross-ancestry meta-analysis weighted)                       | 0.0296539                              | 0.01933217      | 0.055877723                            | 0.065031283     |
| GRS (Ancestry-specific weighted)                                  | 0.0139658                              | 0.009028        | 0.054915473                            | 0.063901433     |
| GRS_IQGAP1 (Unweighted)                                           | 0.0241609                              | 0.01570446      | 0.044473603                            | 0.051663403     |
| GRS_IQGAP1 (Cross-ancestry meta-analysis weighted)                | 0.0285905                              | 0.01862821      | 0.055884283                            | 0.065038993     |
| GRS_IQGAP1 (Ancestry-specific weighted)                           | 0.0139981                              | 0.00904908      | 0.054923783                            | 0.063911183     |

**Abbreviations:** POAG = primary open-angle glaucoma, PCs = principal components, GRS = genetic risk scores, AFR = non-Hispanic African ancestry, EUR = non-Hispanic European ancestry, MVP = Million Veteran Program.
