# Supplementary material
Source: PubMed Central journal article supplement (PMC9997524)
Supplement: NIHMS1873655-supplement-Table_S5.pdf [file NIHMS1873655-supplement-Table_S5.pdf]

**Table S5. Comparison of 127-variant POAG GRS with and without the addition of rs16944405 (*IQGAP1*) for predicting POAG case-control status in EUR and AFR individuals in the MVP. Adjusted models included age, sex, and 10 PCs as covariates.**

| Model      | GRS Type                     | AFR                    |                        |         | EUR                    |                        |         |
|------------|------------------------------|------------------------|------------------------|---------|------------------------|------------------------|---------|
|            |                              | AUC<br>(95% CI)        |                        | p-value | AUC<br>(95% CI)        |                        | p-value |
|            |                              | GRS                    | GRS+ <i>IQGAP</i>      |         | GRS                    | GRS+ <i>IQGAP</i>      |         |
| Unadjusted | Unweighted                   | 0.604<br>(0.591-0.618) | 0.605<br>(0.592-0.618) | 0.712   | 0.651<br>(0.641-0.66)  | 0.651<br>(0.641-0.66)  | 0.383   |
|            | Cross-ancestry meta-analysis | 0.617<br>(0.604-0.63)  | 0.615<br>(0.602-0.629) | 0.326   | 0.668<br>(0.658-0.677) | 0.668<br>(0.658-0.677) | 0.822   |
|            | Ancestry-specific            | 0.578<br>(0.565-0.591) | 0.579<br>(0.565-0.592) | 0.787   | 0.667<br>(0.657-0.676) | 0.667<br>(0.657-0.676) | 0.926   |
| Adjusted   | Unweighted                   | 0.683<br>(0.669-0.696) | 0.683<br>(0.669-0.696) | 0.468   | 0.654<br>(0.645-0.664) | 0.654<br>(0.644-0.663) | 0.324   |
|            | Cross-ancestry meta-analysis | 0.686<br>(0.673-0.7)   | 0.686<br>(0.673-0.699) | 0.794   | 0.67<br>(0.661-0.679)  | 0.67<br>(0.661-0.679)  | 0.941   |
|            | Ancestry-specific            | 0.676<br>(0.662-0.689) | 0.676<br>(0.662-0.69)  | 0.516   | 0.669<br>(0.66-0.678)  | 0.669<br>(0.66-0.678)  | 0.898   |

**Abbreviations:** POAG = primary open-angle glaucoma, PCs = principal components, GRS = genetic risk score, AFR = non-Hispanic African ancestry, EUR = non-Hispanic European ancestry, AUC= area under the curve, CI = confidence interval, MVP = Million Veteran Program.
