# Supplementary material
Source: PubMed Central journal article supplement (PMC9997524)
Supplement: NIHMS1873655-supplement-Table_S6.pdf [file NIHMS1873655-supplement-Table_S6.pdf]

**Table S6. IGS case-control demographics in the MVP.** Genetic ancestry of Veterans in the MVP was determined based on the Harmonized Ancestry and Race/Ethnicity (HARE) algorithm. IGS case-control status was determined based on documented IGS in the EHRs of Veterans in the MVP. IGS cases included individuals who had trabeculectomies or GDI documented in their EHR. IGS controls were POAG-affected Veterans in the MVP who did not have any IGS type documented in their EHR.

|                          | African Ancestry |                 |                |                 |                 |                                      | European Ancestry |                 |                 |                 |                 |                                      |
|--------------------------|------------------|-----------------|----------------|-----------------|-----------------|--------------------------------------|-------------------|-----------------|-----------------|-----------------|-----------------|--------------------------------------|
|                          | IGS Cases        |                 |                | Controls        | Total           | <i>p</i> -value Any IGS <sup>a</sup> | IGS Cases         |                 |                 | Controls        | Total           | <i>p</i> -value Any IGS <sup>a</sup> |
|                          | Trabeculectomy   | GDI             | Any IGS        |                 |                 |                                      | Trabeculectomy    | GDI             | Any IGS         |                 |                 |                                      |
| <b>N (% total)</b>       | 123<br>(5.24)    | 149<br>(6.28)   | 223<br>(9.11)  | 2225<br>(90.89) | 2448<br>(100)   |                                      | 107<br>(3.28)     | 156<br>(4.7)    | 222<br>(6.56)   | 3160<br>(93.44) | 3382<br>(100)   |                                      |
| <b>Average Age (SD)</b>  | 68.62<br>(10.19) | 68.13<br>(9.78) | 68.5<br>(9.82) | 66.65<br>(9.4)  | 66.82<br>(9.46) | 0.0077                               | 73.2<br>(8.94)    | 73.91<br>(8.52) | 73.77<br>(8.65) | 73.29<br>(9.61) | 73.32<br>(9.55) | 0.4341                               |
| <b>N Males (% total)</b> | 119<br>(96.75)   | 145<br>(97.32)  | 216<br>(96.86) | 2112<br>(94.92) | 2328<br>(95.1)  | 0.2643                               | 104<br>(97.2)     | 153<br>(98.08)  | 217<br>(97.75)  | 3046<br>(96.39) | 3263<br>(96.48) | 0.3837                               |

**Abbreviations:** POAG = primary open-angle glaucoma, IGS = invasive glaucoma surgeries, MVP = Million Veteran Program, GDI = glaucoma drainage implants, Any IGS = trabeculectomy or GDI, SD = standard deviation.

<sup>a</sup>*p*-values from Welch's *t*-test for age, and chi-square test for sex. Comparison between Any IGS cases and controls.
