# Supplementary material
Source: PubMed Central journal article supplement (PMC9997524)
Supplement: NIHMS1873655-supplement-Table_S7.pdf [file NIHMS1873655-supplement-Table_S7.pdf]

**Table S7. Association analysis results for 127-variant POAG GRS and IGS type in the MVP.** We performed logistic regression-based association analyses of GRS and different IGS case groups including (i) individuals who only had trabeculectomies documented in their EHR, (ii) individuals who only had GDI documented in their EHR, and (iii) individuals who had either trabeculectomies or GDI documented in their EHR. Adjusted models include covariates for age, sex, and 10 principal components. GRS were unweighted or weighted by published cross-ancestry meta-analysis or ancestry-specific effect estimates.

| Outcome        | Model      | GRS Type                     | African Ancestry |            |         |        | European Ancestry |            |         |                         |
|----------------|------------|------------------------------|------------------|------------|---------|--------|-------------------|------------|---------|-------------------------|
|                |            |                              | Estimate         | Std. Error | z value | P      | Estimate          | Std. Error | z value | P                       |
| Trabeculectomy | Unadjusted | Unweighted                   | 0.18             | 0.093      | 1.931   | 0.0534 | 0.153             | 0.098      | 1.557   | 0.1195                  |
|                |            | Cross-ancestry meta-analysis | 0.183            | 0.093      | 1.97    | 0.0488 | 0.157             | 0.096      | 1.626   | 0.104                   |
|                |            | Ancestry-specific            | 0.254            | 0.094      | 2.699   | 0.0069 | 0.183             | 0.095      | 1.922   | 0.0546                  |
|                | Adjusted   | Unweighted                   | 0.147            | 0.097      | 1.52    | 0.1286 | 0.156             | 0.099      | 1.578   | 0.1145                  |
|                |            | Cross-ancestry meta-analysis | 0.151            | 0.096      | 1.569   | 0.1167 | 0.161             | 0.096      | 1.681   | 0.0927                  |
|                |            | Ancestry-specific            | 0.276            | 0.096      | 2.869   | 0.0041 | 0.185             | 0.094      | 1.96    | 0.05                    |
| GDI            | Unadjusted | Unweighted                   | 0.101            | 0.085      | 1.187   | 0.2353 | 0.319             | 0.082      | 3.863   | 0.000112                |
|                |            | Cross-ancestry meta-analysis | 0.108            | 0.085      | 1.27    | 0.204  | 0.337             | 0.079      | 4.274   | 1.92 x 10 <sup>-5</sup> |
|                |            | Ancestry-specific            | 0.239            | 0.086      | 2.781   | 0.0054 | 0.345             | 0.077      | 4.469   | 7.87 x 10 <sup>-6</sup> |
|                | Adjusted   | Unweighted                   | 0.09             | 0.087      | 1.036   | 0.3    | 0.313             | 0.083      | 3.751   | 0.000176                |
|                |            | Cross-ancestry meta-analysis | 0.092            | 0.087      | 1.055   | 0.2913 | 0.338             | 0.079      | 4.25    | 2.14 x 10 <sup>-5</sup> |
|                |            | Ancestry-specific            | 0.243            | 0.087      | 2.793   | 0.0052 | 0.345             | 0.078      | 4.43    | 9.44 x 10 <sup>-6</sup> |
| Any IGS        | Unadjusted | Unweighted                   | 0.123            | 0.071      | 1.743   | 0.0814 | 0.248             | 0.07       | 3.563   | 0.000367                |
|                |            | Cross-ancestry meta-analysis | 0.129            | 0.07       | 1.838   | 0.066  | 0.265             | 0.068      | 3.927   | 8.61 x 10 <sup>-5</sup> |
|                |            | Ancestry-specific            | 0.216            | 0.071      | 3.036   | 0.0024 | 0.276             | 0.067      | 4.14    | 3.48 x 10 <sup>-5</sup> |
|                | Adjusted   | Unweighted                   | 0.109            | 0.073      | 1.495   | 0.1349 | 0.244             | 0.07       | 3.473   | 0.000515                |
|                |            | Cross-ancestry meta-analysis | 0.114            | 0.073      | 1.561   | 0.1185 | 0.265             | 0.068      | 3.909   | 9.27 x 10 <sup>-5</sup> |
|                |            | Ancestry-specific            | 0.226            | 0.072      | 3.121   | 0.0018 | 0.274             | 0.067      | 4.102   | 4.09 x 10 <sup>-5</sup> |

**Abbreviations:** POAG = primary open-angle glaucoma, IGS = invasive glaucoma surgeries, MVP = Million Veteran Program, GDI = glaucoma drainage implants, Any IGS = trabeculectomy or GDI.
