# Supplementary material
Source: PubMed Central journal article supplement (PMC9997524)
Supplement: NIHMS1873655-supplement-Table_S8.pdf [file NIHMS1873655-supplement-Table_S8.pdf]

**Table S8. Log odds ratios for IGS outcomes comparing the top decile to the remaining 90% for each GRS type calculated for AFR and EUR POAG-affected Veterans in the MVP.** GRS were unweighted or weighted by published cross-ancestry meta-analysis or ancestry-specific effect estimates. We tested for statistical association between deciles of GRS and IGS type (“Trabeculectomy,” “GDI,” or “Any IGS”) and compared the top decile to the reference bottom 90%. The “Any IGS” group included individuals who had either trabeculectomies or GDI documented in their EHR. Models were unadjusted for additional covariates.

| Outcome        | GRS Type                     | AFR beta (95% CI)     | AFR OR (95% CI)     | AFR <i>p</i> -value | EUR beta (95% CI)    | EUR OR (95% CI)     | EUR <i>p</i> -value |
|----------------|------------------------------|-----------------------|---------------------|---------------------|----------------------|---------------------|---------------------|
| Trabeculectomy | Unweighted                   | -0.03 (-0.692-0.541)  | 0.971 (0.5-1.718)   | 0.92366             | 0.132 (-0.531-0.704) | 1.141 (0.588-2.021) | 0.67283             |
|                | Cross-ancestry meta-analysis | -0.24 (-0.965-0.372)  | 0.787 (0.381-1.45)  | 0.476726            | 0.132 (-0.531-0.704) | 1.141 (0.588-2.021) | 0.67283             |
|                | Ancestry-specific            | 0.064 (-0.573-0.619)  | 1.066 (0.564-1.857) | 0.831497            | 0.398 (-0.199-0.925) | 1.488 (0.82-2.523)  | 0.162614            |
| GDI            | Unweighted                   | -0.354 (-1.041-0.229) | 0.702 (0.353-1.258) | 0.269567            | 0.412 (-0.079-0.857) | 1.509 (0.924-2.356) | 0.083241            |
|                | Cross-ancestry meta-analysis | -0.163 (-0.795-0.385) | 0.85 (0.451-1.47)   | 0.585485            | 0.573 (0.108-0.999)  | 1.774 (1.114-2.716) | 0.011368            |
|                | Ancestry-specific            | 0.417 (-0.09-0.879)   | 1.518 (0.914-2.408) | 0.089733            | 0.573 (0.108-0.999)  | 1.774 (1.114-2.716) | 0.011368            |
| Any IGS        | Unweighted                   | -0.133 (-0.641-0.323) | 0.876 (0.527-1.381) | 0.58767             | 0.279 (-0.153-0.676) | 1.322 (0.858-1.966) | 0.185217            |
|                | Cross-ancestry meta-analysis | -0.133 (-0.641-0.323) | 0.876 (0.527-1.381) | 0.58767             | 0.407 (-0.007-0.79)  | 1.503 (0.993-2.204) | 0.04446             |
|                | Ancestry-specific            | 0.238 (-0.208-0.647)  | 1.268 (0.812-1.91)  | 0.274189            | 0.448 (0.039-0.827)  | 1.565 (1.04-2.286)  | 0.025314            |

**Abbreviations:** IGS = invasive glaucoma surgeries, GDI = glaucoma drainage implants, Any IGS = trabeculectomy or GDI, GRS = genetic risk score, AFR = non-Hispanic African ancestry, EUR = non-Hispanic European ancestry, MVP = Million Veteran Program, OR = odds ratio, CI = confidence interval.
