# Supplementary material
Source: PubMed Central journal article supplement (PMC9997524)
Supplement: NIHMS1873655-supplement-Table_S9.pdf [file NIHMS1873655-supplement-Table_S9.pdf]

**Table S9. 127-variant POAG GRS performance for predicting different types of IGS in AFR and EUR Veterans in the MVP.** IGS case groups included (i) individuals who only had trabeculectomies documented in their EHR, (ii) individuals who only had GDI documented in their EHR, and (iii) individuals who had either trabeculectomies or GDI documented in their EHR. GRS were unweighted or weighted by published cross-ancestry meta-analysis or ancestry-specific effect estimates. Adjusted models include covariates for age, sex, and 10 principal components. We statistically compared GRS performance across ancestral groups for each IGS type using an extension of DeLong’s test for independent ROC curves.

| Outcome        | Model      | GRS Type                     | AFR AUC (95% CI) | EUR AUC (95% CI) | EUR vs. AFR <i>p</i> -value |
|----------------|------------|------------------------------|------------------|------------------|-----------------------------|
| Trabeculectomy | Unadjusted | Unweighted                   | 0.55 (0.51-0.60) | 0.54 (0.48-0.59) | 0.672                       |
|                |            | Cross-ancestry meta-analysis | 0.56 (0.51-0.60) | 0.54 (0.49-0.59) | 0.617                       |
|                |            | Ancestry-specific            | 0.58 (0.53-0.62) | 0.55 (0.49-0.60) | 0.390                       |
|                | Adjusted   | Unweighted                   | 0.62 (0.57-0.66) | 0.61 (0.56-0.67) | 0.952                       |
|                |            | Cross-ancestry meta-analysis | 0.62 (0.57-0.67) | 0.61 (0.56-0.66) | 0.869                       |
|                |            | Ancestry-specific            | 0.64 (0.59-0.68) | 0.61 (0.56-0.67) | 0.561                       |
| GDI            | Unadjusted | Unweighted                   | 0.53 (0.48-0.58) | 0.59 (0.55-0.64) | 0.046                       |
|                |            | Cross-ancestry meta-analysis | 0.53 (0.49-0.58) | 0.60 (0.56-0.64) | 0.031                       |
|                |            | Ancestry-specific            | 0.57 (0.52-0.62) | 0.60 (0.56-0.65) | 0.282                       |
|                | Adjusted   | Unweighted                   | 0.59 (0.55-0.63) | 0.64 (0.6-0.69)  | 0.094                       |
|                |            | Cross-ancestry meta-analysis | 0.59 (0.54-0.63) | 0.65 (0.6-0.69)  | 0.063                       |
|                |            | Ancestry-specific            | 0.61 (0.57-0.66) | 0.65 (0.61-0.7)  | 0.251                       |
| Any IGS        | Unadjusted | Unweighted                   | 0.54 (0.50-0.57) | 0.57 (0.53-0.61) | 0.206                       |
|                |            | Cross-ancestry meta-analysis | 0.54 (0.50-0.58) | 0.58 (0.54-0.61) | 0.142                       |
|                |            | Ancestry-specific            | 0.56 (0.53-0.60) | 0.58 (0.54-0.62) | 0.526                       |
|                | Adjusted   | Unweighted                   | 0.59 (0.55-0.63) | 0.61 (0.57-0.65) | 0.411                       |
|                |            | Cross-ancestry meta-analysis | 0.59 (0.55-0.63) | 0.62 (0.58-0.65) | 0.328                       |
|                |            | Ancestry-specific            | 0.61 (0.58-0.65) | 0.62 (0.58-0.66) | 0.788                       |

**Abbreviations:** AFR = non-Hispanic African ancestry, EUR = non-Hispanic European ancestry, MVP = Million Veteran Program, GRS = genetic risk score, IGS = invasive glaucoma surgeries, GDI = glaucoma drainage implants, Any IGS = trabeculectomy or GDI, AUC = area under the curve, CI = confidence interval.
