# Supplementary material
Source: PubMed Central journal article supplement (PMC9997524)
Supplement: NIHMS1873655-supplement-Table_S10.pdf [file NIHMS1873655-supplement-Table_S10.pdf]

**Table S10. Global genetic ancestry calculated for AFR and EUR POAG cases and controls in the MVP.** We determined global genetic ancestry using ADMIXTURE 1.3 with five reference populations from the 1000 Genomes Project: British in England and Scotland [GBR], Yoruba in Ibadan, Nigeria [YRI], Luhya in Webuye, Kenya [LWK], Han Chinese in Beijing, China [CHB], and Peruvian from Lima, Peru [PEL]. GBR served as the reference for non-Finnish European ancestry, while YRI+LWK were used as the reference for African ancestry. Data shown represent the median genetic global ancestry by POAG case-control status in AFR and EUR Veterans in the MVP. P-values were based on Mann-Whitney U tests for equal distributions.

| Group<br>(Reference)           | Median Global Genetic Ancestry<br>(IQR) |                           |                           | p-value |
|--------------------------------|-----------------------------------------|---------------------------|---------------------------|---------|
|                                | Case                                    | Control                   | Total                     |         |
| <b>AFR</b><br><b>(YRI+LWK)</b> | 0.8489<br>(0.7831-0.9005)               | 0.8273<br>(0.7388-0.8906) | 0.8348<br>(0.7522-0.8940) | <0.0001 |
| <b>EUR</b><br><b>(GBR)</b>     | 0.9690<br>(0.9561-0.9787)               | 0.9698<br>(0.9576-0.9793) | 0.9698<br>(0.9575-0.9793) | 0.0017  |

**Abbreviations:** AFR = African ancestry, EUR = European ancestry, POAG = primary open-angle glaucoma, MVP = Million Veteran Program, IQR =

interquartile range, YRI = Yoruba in Ibadan, Nigeria, LWK = Luhya in Webuye, Kenya, GBR = British in England and Scotland.
